# Supplementary material
Source: PubMed Central journal article supplement (PMC4014315)
Supplement: NIHMS565620-supplement-Supplement.pdf [file NIHMS565620-supplement-Supplement.pdf]

There is also a video associated with the article.

<http://www.jove.com/video/50539/force-measurement-during-contraction-to-assess-muscle-function>
